# Supplementary material for: Diversity and Global Distribution of IncL/M Plasmids Enabling Horizontal Dissemination ofβ-Lactam Resistance Genes among the Enterobacteriaceae
Source: Hindawi journal article supplement (doi:10.1155/2015/414681), 2015-01-01
Supplement: f1 [file 414681.f1.pdf]

**Supplementary Table 1.** Genes located within plasmids pARM26 and pIGT15.

| Gene no.                   | Coding region (bp) | Strand | Protein size (aa) | Possible function                              | Best BLAST hits |                                                            |                       |
|----------------------------|--------------------|--------|-------------------|------------------------------------------------|-----------------|------------------------------------------------------------|-----------------------|
|                            |                    |        |                   |                                                | aa identity (%) | Organism (plasmid)                                         | GenBank accession no. |
| Plasmid pARM26 (86,948 bp) |                    |        |                   |                                                |                 |                                                            |                       |
| 1                          | 297-1352           | →      | 351               | replication initiator protein, RepA            | 351/351 (100%)  | <i>Enterobacter cloacae</i> (pENT-e56)                     | AIX57116              |
| 2                          | 2725-4812          | ←      | 695               | conjugation protein TrbC                       | 695/695 (100%)  | <i>Serratia marcescens</i> (R830b)                         | YP_006964547          |
| 3                          | 4825-5844          | ←      | 339               | conjugation protein TrbB                       | 339/339 (100%)  | <i>Klebsiella oxytoca</i> (pACM1)                          | YP_009062595          |
| 4                          | 5786-7093          | ←      | 435               | conjugation protein TrbA                       | 435/435 (100%)  | <i>Klebsiella oxytoca</i> (pACM1)                          | YP_009062594          |
| 5                          | 7093-7488          | ←      | 131               | conjugation protein TrbN                       | 131/131 (100%)  | <i>Klebsiella oxytoca</i> (pACM1)                          | YP_009062593          |
| 6                          | 7593-7988          | ←      | 131               | hypothetical protein                           | 131/131 (100%)  | <i>Klebsiella oxytoca</i> (pACM1)                          | YP_009062592          |
| 7                          | 8056-8709          | →      | 217               | transfer inhibition protein Tir                | 217/217 (100%)  | <i>Klebsiella oxytoca</i> (pACM1)                          | YP_009062591          |
| 8                          | 8862-9296          | →      | 144               | error-prone repair protein, MucA               | 144/144 (100%)  | <i>Klebsiella oxytoca</i> (pACM1)                          | YP_009062590          |
| 9                          | 9245-10090         | →      | 281               | translesion synthesis protein, MucB, truncated | 280/281 (99%)   | <i>Escherichia coli</i> HVH 87                             | EQP96765              |
| 10                         | 10279-11676        | ←      | 465               | methyl-accepting chemotaxis protein            | 465/465 (100%)  | <i>Escherichia coli</i> (p1658/97)                         | NP_862996             |
| 11                         | 11849-12553        | ←      | 234               | IS26 transposase                               | 234/234 (100%)  | <i>Klebsiella pneumoniae</i> (pNDM-OM)                     | AFZ84500              |
| 12                         | 12578-13495        | →      | 305               | galactoside permease                           | 305/305 (100%)  | <i>Escherichia coli</i> (p1658/97)                         | NP_863016             |
| 13                         | 13526-14614        | ←      | 362               | recombination protein, RecF                    | 362/362 (100%)  | <i>Klebsiella oxytoca</i> (pACM1)                          | YP_009062589          |
| 14                         | 14702-14983        | ←      | 93                | putative K+ transporting ATPase, KdpC subunit  | 93/93 (100%)    | <i>Klebsiella pneumoniae</i> subsp. <i>pneumoniae</i> KpQ3 | EKF78970              |
| 15                         | 15260-16120        | →      | 286               | SHV-5 beta-lactamase                           | 286/286 (100%)  | <i>Klebsiella oxytoca</i> (pACM1)                          | YP_009062588          |
| 16                         | 16141-16902        | ←      | 253               | DeoR family transcriptional regulator          | 253/253 (100%)  | <i>Providencia stuartii</i> (pTC2)                         | YP_006965583          |
| 17                         | 17163-18065        | →      | 300               | putative dehydrogenase                         | 300/300 (100%)  | <i>Klebsiella oxytoca</i> (pACM1)                          | YP_009062586          |
| 18                         | 18077-19342        | →      | 421               | putative ygbK protein                          | 421/421 (100%)  | <i>Klebsiella oxytoca</i> (pACM1)                          | AAL89460.2            |
| 19                         | 19335-19955        | →      | 206               | putative L-fucose-1-phosphate aldolase         | 206/206 (100%)  | <i>Klebsiella oxytoca</i> (pACM1)                          | AAL89459              |
| 20                         | 19960-20721        | →      | 253               | hydroxypyruvate isomerase                      | 253/253 (100%)  | <i>Escherichia coli</i> (p1658/97)                         | NP_863008             |
| 21                         | 20667-21371        | ←      | 234               | IS26 transposase                               | 234/234 (100%)  | <i>Klebsiella pneumoniae</i> (pNDM-OM)                     | AFZ84500              |
| 22                         | 21446-22459        | ←      | 337               | integrase                                      | 337/337 (100%)  | <i>Escherichia coli</i> (p1658/97)                         | NP_863006             |
| 23                         | 22675-23193        | →      | 172               | aminoglycoside 6'-N-acetyltransferase          | 172/172 (100%)  | <i>Klebsiella oxytoca</i> (pACM1)                          | AAC77498              |
| 24                         | 23269-23733        | →      | 154               | aminoglycoside 3'-acetyltransferase            | 154/154 (100%)  | <i>Klebsiella oxytoca</i> (pACM1)                          | YP_009062574          |
| 25                         | 23852-24364        | →      | 170               | GCN5 family acetyltransferase                  | 170/170 (100%)  | <i>Klebsiella oxytoca</i> (pACM1)                          | YP_009062573          |
| 26                         | 24380-24685        | →      | 101               | hypothetical protein                           | 101/101 (100%)  | <i>Klebsiella oxytoca</i> (pACM1)                          | AAC77502              |
| 27                         | 24777- 25568       | →      | 263               | 3'-O-adenyltransferase                         | 263/263 (100%)  | <i>Klebsiella oxytoca</i> (pACM1)                          | YP_009062571          |
| 28                         | 25732-26079        | →      | 115               | QacE-delta1                                    | 115/115 (100%)  | <i>Klebsiella pneumoniae</i> (pFOX-7a)                     | YP_009067913          |
| 29                         | 26073-26912        | →      | 279               | dihydropteroate synthase type I                | 279/279 (100%)  | <i>Klebsiella oxytoca</i> (pACM1)                          | AIM47853              |
| 30                         | 27040-27540        | →      | 166               | hypothetical protein                           | 166/166 (100%)  | <i>Shigella flexneri</i> 2b(R100)                          | NP_052894             |
| 31                         | 27509-28018        | ←      | 169               | NTP-binding protein                            | 169/169 (100%)  | <i>Acinetobacter baumannii</i> AB0057                      | YP_002317676          |
| 32                         | 28017-28811        | →      | 264               | IS6100 transposase                             | 264/264 (100%)  | <i>Trueperella pyogenes</i>                                | NP_940743             |
| 33                         | 29049-29261        | ←      | 70                | Urf2Y                                          | 70/70 (100%)    | <i>Klebsiella oxytoca</i> (pACM1)                          | YP_009062566          |

| Gene no. | Coding region (bp) | Strand | Protein size (aa) | Possible function                                      | Best BLAST hits |                                        |                       |
|----------|--------------------|--------|-------------------|--------------------------------------------------------|-----------------|----------------------------------------|-----------------------|
|          |                    |        |                   |                                                        | aa identity (%) | Organism (plasmid)                     | GenBank accession no. |
| 34       | 29327-29563        | ←      | 78                | mercury resistance protein, MerE                       | 78/78 (100%)    | <i>Serratia marcescens</i> (R478)      | NP_941189             |
| 35       | 29560-29925        | ←      | 121               | transcriptional regulator MerD                         | 121/121 (100%)  | <i>Serratia marcescens</i> (R478)      | NP_941190.2           |
| 36       | 29943-31628        | ←      | 561               | mercuric reductase, MerA                               | 561/561 (100%)  | <i>Serratia marcescens</i> (R478)      | NP_941191             |
| 37       | 31667-32092        | ←      | 141               | mercury transport protein, MerC                        | 141/141 (100%)  | <i>Serratia marcescens</i> (R478)      | NP_941192             |
| 38       | 32120-32395        | ←      | 91                | mercuric transport protein periplasmic component, MerP | 91/91 (100%)    | <i>Serratia marcescens</i> (R478)      | NP_941193             |
| 39       | 32411-32776        | ←      | 121               | mercuric transport protein, MerT                       | 121/121 (100%)  | <i>Serratia marcescens</i> (R478)      | NP_941194             |
| 40       | 32848-33303        | →      | 151               | transcriptional regulator, MerR                        | 151/151 (100%)  | <i>Serratia marcescens</i> (R478)      | NP_941195             |
| 41       | 33715-34392        | ←      | 225               | tetracycline resistance repressor protein, TetR        | 225/225 (100%)  | uncultured bacterium (pRSB101)         | YP_133837             |
| 42       | 34396-35670        | →      | 424               | tetracycline resistance protein, TetA                  | 424/424 (100%)  | uncultured bacterium (pRSB201)         | YP_009064288          |
| 43       | 35702-36586        | ←      | 294               | PecM-like protein                                      | 294/294 (100%)  | uncultured bacterium (pTB11)           | YP_112360             |
| 44       | 37075-38871        | →      | 598               | truncated Tn3 transposase                              | 598/598 (100%)  | <i>Klebsiella oxytoca</i> (pACM1)      | AIM47840              |
| 45       | 38932-39369        | →      | 145               | translesion synthesis protein, MucB, truncated         | 145/145 (100%)  | <i>Klebsiella pneumoniae</i> (pFOX-7a) | YP_009067897          |
| 46       | 39392-40240        | ←      | 282               | exonuclease                                            | 282/282 (100%)  | <i>Klebsiella oxytoca</i> (pACM1)      | YP_009062646          |
| 47       | 40243-40563        | ←      | 106               | hypothetical protein                                   | 106/106 (100%)  | <i>Klebsiella oxytoca</i> (pACM1)      | YP_009062645          |
| 48       | 40708-42346        | ←      | 212               | hypothetical protein                                   | 212/212 (100%)  | <i>Klebsiella oxytoca</i> (pACM1)      | YP_009062644          |
| 49       | 41415-41624        | ←      | 69                | hypothetical protein                                   | 69/69 (100%)    | <i>Citrobacter freundii</i> (pCTX-M3)  | NP_774971             |
| 50       | 41627-41845        | ←      | 72                | hypothetical protein                                   | 72/72 (100%)    | <i>Citrobacter freundii</i> (pCTX-M3)  | NP_774972             |
| 51       | 41890-42573        | ←      | 227               | hypothetical protein                                   | 227/227 (100%)  | <i>Klebsiella oxytoca</i> (pACM1)      | YP_009062643          |
| 52       | 42570-43229        | ←      | 219               | RelB antitoxin domain-containing protein               | 219/219 (100%)  | <i>Klebsiella oxytoca</i> (pACM1)      | YP_009062642          |
| 53       | 43732-44037        | →      | 101               | hypothetical protein                                   | 89/100 (89%)    | <i>Erwinia amylovora</i> (pEL60)       | NP_943209             |
| 54       | 44330-44914        | →      | 194               | hypothetical protein                                   | 194/194 (100%)  | <i>Klebsiella oxytoca</i> (pACM1)      | YP_009062641          |
| 55       | 44911-45630        | →      | 239               | hypothetical protein                                   | 239/239 (100%)  | <i>Klebsiella oxytoca</i> (pACM1)      | YP_009062640          |
| 56       | 45791-46339        | ←      | 182               | hypothetical protein                                   | 182/182 (100%)  | <i>Klebsiella oxytoca</i> (pACM1)      | YP_009062639          |
| 57       | 46480-46941        | →      | 153               | hypothetical protein                                   | 153/153 (100%)  | <i>Klebsiella oxytoca</i> (pACM1)      | YP_009062638          |
| 58       | 46480-46941        | →      | 195               | hypothetical protein                                   | 195/195 (100%)  | <i>Klebsiella oxytoca</i> (pACM1)      | YP_009062637          |
| 59       | 47763-48248        | →      | 161               | hypothetical protein                                   | 161/161 (100%)  | <i>Klebsiella oxytoca</i> (pACM1)      | YP_009062636          |
| 60       | 48512-49252        | →      | 246               | resolvase                                              | 246/246 (100%)  | <i>Erwinia amylovora</i> (pEL60)       | NP_943215             |
| 61       | 49493-50467        | →      | 324               | plasmid segregation protein ParM                       | 324/324 (100%)  | <i>Erwinia amylovora</i> (pEL60)       | NP_943216             |
| 62       | 50470-50913        | →      | 147               | plasmid stability protein B                            | 147/147 (100%)  | <i>Erwinia amylovora</i> (pEL60)       | NP_943217             |
| 63       | 50923-51474        | →      | 183               | endonuclease Nuc                                       | 183/183 (100%)  | <i>Erwinia amylovora</i> (pEL60)       | NP_943218             |
| 64       | 51590-52096        | →      | 168               | hypothetical protein                                   | 168/168 (100%)  | <i>Erwinia amylovora</i> (pEL60)       | NP_943219             |
| 65       | 52089-52568        | →      | 159               | hypothetical protein                                   | 159/159 (100%)  | <i>Erwinia amylovora</i> (pEL60)       | NP_943220             |
| 66       | 52597-53007        | →      | 136               | hypothetical protein                                   | 136/136 (100%)  | <i>Serratia marcescens</i> (R830b)     | YP_006964582          |
| 67       | 53125-53388        | →      | 87                | hypothetical protein                                   | 87/87 (100%)    | <i>Citrobacter freundii</i> (pCTX-M3)  | NP_774992             |
| 68       | 53410-53772        | →      | 120               | hypothetical protein                                   | 120/120 (100%)  | <i>Erwinia amylovora</i> (pEL60)       | NP_943223             |
| 69       | 53894-54343        | →      | 149               | DNA repair protein RadC                                | 149/149 (100%)  | <i>Erwinia amylovora</i> (pEL60)       | NP_943224             |

| Gene no. | Coding region (bp) | Strand | Protein size (aa) | Possible function                      | Best BLAST hits  |                                               |                       |
|----------|--------------------|--------|-------------------|----------------------------------------|------------------|-----------------------------------------------|-----------------------|
|          |                    |        |                   |                                        | aa identity (%)  | Organism (plasmid)                            | GenBank accession no. |
| 70       | 54388-54654        | →      | 88                | transcriptional repressor KorC         | 88/88 (100%)     | <i>Erwinia amylovora</i> (pEL60)              | NP_943225             |
| 71       | 54718-56001        | →      | 427               | DGQHR domain-containing protein        | 427/427 (100%)   | <i>Klebsiella oxytoca</i> (pACM1)             | YP_009062626          |
| 72       | 56609-56788        | →      | 59                | CcgAI                                  | 59/59 (100%)     | <i>Erwinia amylovora</i> (pEL60)              | NP_943227             |
| 73       | 56795-57721        | →      | 308               | hypothetical protein                   | 308/308 (100%)   | <i>Klebsiella oxytoca</i> (pACM1)             | YP_009062625          |
| 74       | 57911-58249        | →      | 112               | hypothetical protein                   | 112/112 (100%)   | <i>Enterobacter cloacae ECNIH5</i> (pENT-d0d) | AIX61617              |
| 75       | 58347-58577        | →      | 76                | RmoA                                   | 76/76 (100%)     | <i>Erwinia amylovora</i> (pEL60)              | NP_943230             |
| 76       | 58875-59111        | →      | 78                | hypothetical protein                   | 78/78 (100%)     | <i>Erwinia amylovora</i> (pEL60)              | NP_943231             |
| 77       | 59196-59606        | →      | 136               | hypothetical protein                   | 136/136 (100%)   | <i>Erwinia amylovora</i> (pEL60)              | NP_943232             |
| 78       | 59668-59973        | →      | 101               | hypothetical protein                   | 101/101 (100%)   | <i>Klebsiella pneumoniae</i> (pOXA-48a)       | YP_006958818          |
| 79       | 60174-60614        | →      | 146               | putative anti-restriction protein KlcA | 146/146 (100%)   | <i>Klebsiella oxytoca</i> (pACM1)             | YP_009062622          |
| 80       | 60658-60942        | →      | 94                | hypothetical protein                   | 92/94 (98%)      | <i>Citrobacter freundii</i> (pCTX-M3)         | NP_775004             |
| 81       | 61097-61318        | →      | 73                | hypothetical protein                   | 73/73 (100%)     | <i>Serratia marcescens</i> (R830b)            | YP_006964599          |
| 82       | 61378-61824        | →      | 148               | single-stranded DNA binding protein    | 148/148 (100%)   | <i>Klebsiella oxytoca</i> (pACM1)             | YP_009062621          |
| 83       | 61880-62191        | →      | 103               | hypothetical protein                   | 103/103 (100%)   | <i>Klebsiella pneumoniae</i> (pOXA-48a)       | YP_006958823          |
| 84       | 62324-62860        | →      | 178               | hypothetical protein                   | 178/178 (100%)   | <i>Erwinia amylovora</i> (pEL60)              | NP_943238             |
| 85       | 63361-63756        | ←      | 131               | mobilization protein MobC              | 131/131 (100%)   | <i>Klebsiella oxytoca</i> (pACM1)             | YP_009062619          |
| 86       | 64001-64318        | →      | 105               | mobilization protein MobB/NikA         | 105/105 (100%)   | <i>Erwinia amylovora</i> (pEL60)              | NP_943240             |
| 87       | 64305-66284        | →      | 659               | mobilization protein MobA              | 658/659 (99%)    | <i>Klebsiella pneumoniae</i> (pKPoxa-48N1)    | AGL12941              |
| 88       | 66298-66798        | →      | 166               | conjugation protein TraH               | 166/166 (100%)   | <i>Erwinia amylovora</i> (pEL60)              | NP_943242             |
| 89       | 66795-67574        | →      | 259               | conjugation protein TraI               | 259/259 (100%)   | <i>Citrobacter freundii</i> (pCTX-M3)         | NP_775013             |
| 90       | 67585-68748        | →      | 387               | plasmid transfer ATPase TraJ           | 387/387 (100%)   | <i>Citrobacter freundii</i> (pCTX-M3)         | NP_775014             |
| 91       | 68738-68998        | →      | 86                | conjugation protein TraK               | 86/86 (100%)     | <i>Citrobacter freundii</i> (pCTX-M3)         | NP_775015             |
| 92       | 69023-72325        | →      | 1100              | primase                                | 1100/1100 (100%) | <i>Klebsiella oxytoca</i> (pACM1)             | YP_009062613          |
| 93       | 72249-72803        | →      | 184               | conjugation protein TraL               | 184/184 (100%)   | <i>Erwinia amylovora</i> (pEL60)              | NP_943246             |
| 94       | 72754-73419        | →      | 221               | hypothetical protein                   | 221/221 (100%)   | <i>Klebsiella oxytoca</i> (pACM1)             | YP_009062611          |
| 95       | 73397-74179        | →      | 260               | conjugation protein TraM               | 260/260 (100%)   | <i>Klebsiella oxytoca</i> (pACM1)             | YP_009062610          |
| 96       | 74188-75339        | →      | 383               | conjugation protein TraN               | 383/383 (100%)   | <i>Klebsiella oxytoca</i> (pACM1)             | YP_009062609          |
| 97       | 75351-76700        | →      | 449               | conjugation protein TraO               | 449/449 (100%)   | <i>Klebsiella oxytoca</i> (pACM1)             | YP_009062608          |
| 98       | 76712-77416        | →      | 234               | conjugation protein TraP               | 234/234 (100%)   | <i>Klebsiella oxytoca</i> (pACM1)             | YP_009062607          |
| 99       | 77440-77970        | →      | 176               | conjugation protein TraQ               | 176/176 (100%)   | <i>Klebsiella oxytoca</i> (pACM1)             | YP_009062606          |
| 100      | 77987-78376        | →      | 129               | conjugation protein TraR               | 129/129 (100%)   | <i>Klebsiella oxytoca</i> (pACM1)             | YP_009062605          |
| 101      | 78422-78916        | →      | 164               | hypothetical protein                   | 164/164 (100%)   | <i>Citrobacter freundii</i> (pCTX-M3)         | NP_775026             |
| 102      | 78913-81963        | →      | 1016              | conjugation protein TraU               | 1016/1016 (100%) | <i>Klebsiella oxytoca</i> (pACM1)             | YP_009062604          |
| 103      | 81960-83168        | →      | 402               | conjugation protein TraW               | 402/402 (100%)   | <i>Klebsiella oxytoca</i> (pACM1)             | YP_009062603          |
| 104      | 83165-83815        | →      | 216               | conjugation protein TraX               | 216/216 (100%)   | <i>Klebsiella oxytoca</i> (pACM1)             | YP_009062602          |
| 105      | 83808-85988        | →      | 726               | conjugation protein TraY               | 726/726 (100%)   | <i>Citrobacter freundii</i> (pCTX-M3)         | NP_775030             |

| Gene no. | Coding region (bp) | Strand | Protein size (aa) | Possible function        | Best BLAST hits |                                   |                       |
|----------|--------------------|--------|-------------------|--------------------------|-----------------|-----------------------------------|-----------------------|
|          |                    |        |                   |                          | aa identity (%) | Organism (plasmid)                | GenBank accession no. |
| 106      | 85991-86644        | →      | 217               | exclusion protein ExcA   | 217/217 (100%)  | <i>Klebsiella oxytoca</i> (pACM1) | YP_009062600          |
| 107      | 86718-86948        | →      | 76                | replication protein RepC | 76/76 (100%)    | <i>Klebsiella oxytoca</i> (pACM1) | YP_009062599          |

### Plasmid pIGT15 (74,839 bp)

|    |             |   |     |                                                           |                |                                                            |              |
|----|-------------|---|-----|-----------------------------------------------------------|----------------|------------------------------------------------------------|--------------|
| 1  | 297-1352    | → | 351 | replication initiator protein, RepA                       | 351/351 (100%) | <i>Enterobacter cloacae</i> (pENT-e56)                     | AIX57116     |
| 2  | 2725-4812   | ← | 695 | conjugation protein, TrbC                                 | 695/695 (100%) | <i>Serratia marcescens</i> (R830b)                         | YP_006964547 |
| 3  | 4825-5844   | ← | 339 | conjugation protein, TrbB                                 | 339/339 (100%) | <i>Klebsiella oxytoca</i> (pACM1)                          | YP_009062595 |
| 4  | 5786-7093   | ← | 435 | conjugation protein, TrbA                                 | 435/435 (100%) | <i>Klebsiella oxytoca</i> (pACM1)                          | YP_009062594 |
| 5  | 7093-7488   | ← | 131 | conjugation protein, TrbN                                 | 131/131 (100%) | <i>Klebsiella oxytoca</i> (pACM1)                          | YP_009062593 |
| 6  | 7593-7988   | ← | 131 | hypothetical protein                                      | 131/131 (100%) | <i>Klebsiella oxytoca</i> (pACM1)                          | YP_009062592 |
| 7  | 8056-8709   | → | 217 | transfer inhibition protein, Tir                          | 217/217 (100%) | <i>Klebsiella oxytoca</i> (pACM1)                          | YP_009062591 |
| 8  | 8862-9296   | → | 144 | error-prone repair protein, MucA                          | 144/144 (100%) | <i>Klebsiella oxytoca</i> (pACM1)                          | YP_009062590 |
| 9  | 9245-10090  | → | 281 | translesion synthesis protein, MucB, truncated            | 280/281 (99%)  | <i>Escherichia coli</i> HVH 87                             | EQP96765     |
| 10 | 10279-11676 | ← | 465 | methyl-accepting chemotaxis protein                       | 465/465 (100%) | <i>Escherichia coli</i> (p1658/97)                         | NP_862996    |
| 11 | 11849-12553 | ← | 234 | IS26 transposase                                          | 234/234 (100%) | <i>Klebsiella pneumoniae</i> (pNDM-OM)                     | AFZ84500     |
| 12 | 12578-13495 | → | 305 | galactoside permease                                      | 305/305 (100%) | <i>Escherichia coli</i> (p1658/97)                         | NP_863016    |
| 13 | 13526-14614 | ← | 362 | recombination protein, RecF                               | 362/362 (100%) | <i>Klebsiella oxytoca</i> (pACM1)                          | YP_009062589 |
| 14 | 14701-14982 | ← | 93  | putative K <sup>+</sup> transporting ATPase, KdpC subunit | 93/93 (100%)   | <i>Klebsiella pneumoniae</i> subsp. <i>pneumoniae</i> KpQ3 | EKF78970     |
| 15 | 15259-1619  | → | 286 | SHV-5 beta-lactamase                                      | 286/286 (100%) | <i>Klebsiella oxytoca</i> (pACM1)                          | YP_009062588 |
| 16 | 16140-16901 | ← | 253 | DeoR family transcriptional regulator                     | 253/253 (100%) | <i>Providencia stuartii</i> (pTC2)                         | YP_006965583 |
| 17 | 17162-18064 | → | 300 | putative dehydrogenase                                    | 300/300 (100%) | <i>Klebsiella oxytoca</i> (pACM1)                          | YP_009062586 |
| 18 | 18076-18723 | → | 215 | putative ygbK protein                                     | 210/210 (100%) | <i>Klebsiella oxytoca</i> (pACM1)                          | AAL89460.2   |
| 19 | 18770-19474 | → | 234 | IS26 transposase                                          | 234/234 (100%) | <i>Klebsiella pneumoniae</i> (pNDM-OM)                     | AFZ84500     |
| 20 | 19616-20629 | ← | 337 | integrase                                                 | 337/337 (100%) | <i>Escherichia coli</i> (p1658/97)                         | NP_863006    |
| 21 | 20845-21363 | → | 172 | aminoglycoside 6'-N-acetyltransferase                     | 172/172 (100%) | <i>Klebsiella oxytoca</i> (pACM1)                          | AAC77498     |
| 22 | 21439-21903 | → | 154 | aminoglycoside 3'-acetyltransferase                       | 154/154 (100%) | <i>Klebsiella oxytoca</i> (pACM1)                          | YP_009062574 |
| 23 | 22022-22534 | → | 170 | GCN5 family acetyltransferase                             | 170/170 (100%) | <i>Klebsiella oxytoca</i> (pACM1)                          | YP_009062573 |
| 24 | 22550-22855 | → | 101 | hypothetical protein                                      | 101/101 (100%) | <i>Klebsiella oxytoca</i> (pACM1)                          | AAC77502     |
| 25 | 22947-23738 | → | 263 | 3"-O-adenyltransferase                                    | 263/263 (100%) | <i>Klebsiella oxytoca</i> (pACM1)                          | YP_009062571 |
| 26 | 23902-24249 | → | 115 | QacE-delta1                                               | 115/115 (100%) | <i>Klebsiella pneumoniae</i> (pFOX-7a)                     | YP_009067913 |
| 27 | 24243-25082 | → | 279 | dihydropteroate synthase type I                           | 279/279 (100%) | <i>Klebsiella oxytoca</i> (pACM1)                          | AIM47853     |
| 28 | 25210-25710 | → | 166 | YbbA                                                      | 166/166 (100%) | <i>Shigella flexneri</i> 2b (R100)                         | NP_052894    |
| 29 | 25679-26188 | ← | 169 | NTP-binding protein                                       | 169/169 (100%) | <i>Acinetobacter baumannii</i> AB0057                      | YP_002317676 |
| 30 | 26187-26981 | → | 264 | IS6100 transposase                                        | 264/264 (100%) | <i>Trueperella pyogenes</i>                                | NP_940743    |
| 31 | 27222-27431 | ← | 70  | Urf2Y protein                                             | 70/70 (100%)   | <i>Klebsiella oxytoca</i> (pACM1)                          | YP_009062566 |
| 32 | 27497-27733 | ← | 78  | mercury resistance protein, MerE                          | 78/78 (100%)   | <i>Serratia marcescens</i> (R478)                          | NP_941189    |
| 33 | 27730-28095 | ← | 121 | transcriptional regulator MerD                            | 121/121 (100%) | <i>Serratia marcescens</i> (R478)                          | NP_941190.2  |

| Gene no. | Coding region (bp) | Strand | Protein size (aa) | Possible function                                      | Best BLAST hits |                                            |                       |
|----------|--------------------|--------|-------------------|--------------------------------------------------------|-----------------|--------------------------------------------|-----------------------|
|          |                    |        |                   |                                                        | aa identity (%) | Organism (plasmid)                         | GenBank accession no. |
| 34       | 28113-29798        | ←      | 561               | mercuric reductase, MerA                               | 561/561 (100%)  | <i>Serratia marcescens</i> (R478)          | NP_941191             |
| 35       | 29837-30262        | ←      | 141               | mercury transport protein, MerC                        | 141/141 (100%)  | <i>Serratia marcescens</i> (R478)          | NP_941192             |
| 36       | 30290-30565        | ←      | 91                | mercuric transport protein periplasmic component, MerP | 91/91 (100%)    | <i>Serratia marcescens</i> (R478)          | NP_941193             |
| 37       | 30581-30946        | ←      | 121               | mercuric transport protein, MerT                       | 121/121 (100%)  | <i>Serratia marcescens</i> (R478)          | NP_941194             |
| 38       | 31018-31473        | →      | 151               | transcriptional regulator, MerR                        | 151/151 (100%)  | <i>Serratia marcescens</i> (R478)          | NP_941195             |
| 39       | 31885-32562        | ←      | 225               | tetracycline resistance repressor protein, TetR        | 225/225 (100%)  | uncultured bacterium (pRSB101)             | YP_133837             |
| 40       | 32566-33840        | →      | 424               | tetracycline resistance protein, TetA                  | 424/424 (100%)  | uncultured bacterium (pRSB201)             | YP_009064288          |
| 41       | 33872-34756        | ←      | 294               | PecM-like protein                                      | 294/294 (100%)  | uncultured bacterium (pTB11)               | YP_112360             |
| 42       | 35245-37041        | →      | 598               | truncated Tn3 transposase                              | 598/598 (100%)  | <i>Klebsiella oxytoca</i> (pACM1)          | AIM47840              |
| 43       | 37102-37536        | →      | 145               | translesion synthesis protein, MucB, truncated         | 145/145 (100%)  | <i>Klebsiella pneumoniae</i> (pFOX-7a)     | YP_009067897          |
| 44       | 37562-38410        | ←      | 282               | exonuclease                                            | 282/282 (100%)  | <i>Klebsiella oxytoca</i> (pACM1)          | YP_009062646          |
| 45       | 38413-38733        | ←      | 106               | hypothetical protein                                   | 106/106 (100%)  | <i>Klebsiella oxytoca</i> (pACM1)          | YP_009062645          |
| 46       | 38878-39516        | ←      | 212               | hypothetical protein                                   | 212/212 (100%)  | <i>Klebsiella oxytoca</i> (pACM1)          | YP_009062644          |
| 47       | 39585-39794        | ←      | 69                | hypothetical protein                                   | 69/69 (100%)    | <i>Citrobacter freundii</i> (pCTX-M3)      | NP_774971             |
| 48       | 39797-40015        | ←      | 72                | hypothetical protein                                   | 72/72 (100%)    | <i>Citrobacter freundii</i> (pCTX-M3)      | NP_774972             |
| 49       | 40060-40743        | ←      | 227               | hypothetical protein                                   | 227/227 (100%)  | <i>Klebsiella oxytoca</i> (pACM1)          | YP_009062643          |
| 50       | 40740-41405        | ←      | 219               | RelB antitoxin domain-containing protein               | 219/219 (100%)  | <i>Klebsiella oxytoca</i> (pACM1)          | YP_009062642          |
| 51       | 41902-42207        | →      | 101               | hypothetical protein                                   | 89/100 (89%)    | <i>Erwinia amylovora</i> (pEL60)           | NP_943209             |
| 52       | 42500-43084        | →      | 194               | hypothetical protein                                   | 194/194 (100%)  | <i>Klebsiella oxytoca</i> (pACM1)          | YP_009062641          |
| 53       | 43081-43800        | →      | 239               | hypothetical protein                                   | 239/239 (100%)  | <i>Klebsiella oxytoca</i> (pACM1)          | YP_009062640          |
| 54       | 43961-44509        | ←      | 182               | hypothetical protein                                   | 182/182 (100%)  | <i>Klebsiella oxytoca</i> (pACM1)          | YP_009062639          |
| 55       | 44650-45111        | →      | 153               | hypothetical protein                                   | 153/153 (100%)  | <i>Klebsiella oxytoca</i> (pACM1)          | YP_009062638          |
| 56       | 45349-45936        | →      | 195               | hypothetical protein                                   | 195/195 (100%)  | <i>Klebsiella oxytoca</i> (pACM1)          | YP_009062637          |
| 57       | 45933-46418        | →      | 161               | hypothetical protein                                   | 161/161 (100%)  | <i>Klebsiella oxytoca</i> (pACM1)          | YP_009062636          |
| 58       | 46682-47422        | →      | 246               | resolvase                                              | 246/246 (100%)  | <i>Erwinia amylovora</i> (pEL60)           | NP_943215             |
| 59       | 47663-48637        | →      | 324               | plasmid segregation protein ParM                       | 324/324 (100%)  | <i>Erwinia amylovora</i> (pEL60)           | NP_943216             |
| 60       | 48640-49083        | →      | 147               | plasmid stability protein B                            | 147/147 (100%)  | <i>Erwinia amylovora</i> (pEL60)           | NP_943217             |
| 61       | 49093-49644        | →      | 183               | endonuclease Nuc                                       | 183/183 (100%)  | <i>Erwinia amylovora</i> (pEL60)           | NP_943218             |
| 62       | 49762-50268        | →      | 168               | hypothetical protein                                   | 168/168 (100%)  | <i>Erwinia amylovora</i> (pEL60)           | NP_943219             |
| 63       | 50261-50740        | →      | 159               | hypothetical protein                                   | 159/159 (100%)  | <i>Erwinia amylovora</i> (pEL60)           | NP_943220             |
| 64       | 50769-51179        | →      | 136               | hypothetical protein                                   | 136/136 (100%)  | <i>Serratia marcescens</i> (R830b)         | YP_006964582          |
| 65       | 51297-51560        | →      | 87                | hypothetical protein                                   | 87/87 (100%)    | <i>Citrobacter freundii</i> (pCTX-M3)      | NP_774992             |
| 66       | 51582-51875        | →      | 97                | hypothetical protein                                   | 79/101 (78%)    | <i>Citrobacter freundii</i> (pCTX-M3)      | NP_774993             |
| 67       | 51892-52209        | →      | 105               | mobilization protein MobB/NikA                         | 105/105 (100%)  | <i>Erwinia amylovora</i> (pEL60)           | NP_943240             |
| 68       | 52196-54175        | →      | 659               | mobilization protein MobA                              | 658/659 (99%)   | <i>Klebsiella pneumoniae</i> (pKPoxa-48N1) | AGL12941              |
| 69       | 54189-54689        | →      | 166               | conjugation protein TraH                               | 166/166 (100%)  | <i>Erwinia amylovora</i> (pEL60)           | NP_943242             |

| Gene no. | Coding region (bp) | Strand | Protein size (aa) | Possible function         | Best BLAST hits  |                                       |                       |
|----------|--------------------|--------|-------------------|---------------------------|------------------|---------------------------------------|-----------------------|
|          |                    |        |                   |                           | aa identity (%)  | Organism (plasmid)                    | GenBank accession no. |
| 70       | 54686-55465        | →      | 259               | conjugation protein Tral  | 259/259 (100%)   | <i>Citrobacter freundii</i> (pCTX-M3) | NP_775013             |
| 71       | 55476-56639        | →      | 387               | conjugation protein TraJ  | 387/387 (100%)   | <i>Citrobacter freundii</i> (pCTX-M3) | NP_775014             |
| 72       | 56629-56889        | →      | 86                | conjugation protein TraK  | 86/86 (100%)     | <i>Citrobacter freundii</i> (pCTX-M3) | NP_775015             |
| 73       | 56914-60216        | →      | 1100              | primase                   | 1100/1100 (100%) | <i>Klebsiella oxytoca</i> (pACM1)     | YP_009062613          |
| 74       | 60140-60694        | →      | 184               | conjugation protein TraL  | 184/184 (100%)   | <i>Erwinia amylovora</i> (pEL60)      | NP_943246             |
| 75       | 60660-61310        | →      | 221               | hypothetical protein      | 221/221 (100%)   | <i>Klebsiella oxytoca</i> (pACM1)     | YP_009062611          |
| 76       | 61288-62070        | →      | 260               | conjugation protein TraM  | 260/260 (100%)   | <i>Klebsiella oxytoca</i> (pACM1)     | YP_009062610          |
| 77       | 62079-63230        | →      | 383               | conjugation protein TraN  | 383/383 (100%)   | <i>Klebsiella oxytoca</i> (pACM1)     | YP_009062609          |
| 78       | 63242-64591        | →      | 449               | conjugation protein TraO  | 449/449 (100%)   | <i>Klebsiella oxytoca</i> (pACM1)     | YP_009062608          |
| 79       | 64603-65307        | →      | 234               | conjugation protein TraP  | 234/234 (100%)   | <i>Klebsiella oxytoca</i> (pACM1)     | YP_009062607          |
| 80       | 65331-65861        | →      | 176               | conjugation protein TraQ  | 176/176 (100%)   | <i>Klebsiella oxytoca</i> (pACM1)     | YP_009062606          |
| 81       | 65878-66267        | →      | 129               | conjugation protein TraR  | 129/129 (100%)   | <i>Klebsiella oxytoca</i> (pACM1)     | YP_009062605          |
| 82       | 66313-66807        | →      | 164               | hypothetical protein      | 164/164 (100%)   | <i>Citrobacter freundii</i> (pCTX-M3) | NP_775026             |
| 83       | 66804-69854        | →      | 1016              | conjugation protein TraU  | 1016/1016 (100%) | <i>Klebsiella oxytoca</i> (pACM1)     | YP_009062604          |
| 84       | 69851-71059        | →      | 402               | conjugation protein TraW  | 402/402 (100%)   | <i>Klebsiella oxytoca</i> (pACM1)     | YP_009062603          |
| 85       | 71056-71706        | →      | 216               | conjugation protein TraX  | 216/216 (100%)   | <i>Klebsiella oxytoca</i> (pACM1)     | YP_009062602          |
| 86       | 71699-73879        | →      | 726               | conjugation protein TraY  | 726/726 (100%)   | <i>Citrobacter freundii</i> (pCTX-M3) | NP_775030             |
| 87       | 73882-74535        | →      | 217               | exclusion protein ExcA    | 217/217 (100%)   | <i>Klebsiella oxytoca</i> (pACM1)     | YP_009062600          |
| 88       | 74609-74839        | →      | 76                | replication protein, RepC | 76/76 (100%)     | <i>Klebsiella oxytoca</i> (pACM1)     | YP_009062599          |
